# Supplementary material
Source: PubMed Central journal article supplement (PMC3092291)
Supplement: NIHMS288598-supplement-1_si_001.pdf [file NIHMS288598-supplement-1_si_001.pdf]

Pyridine Inhibitor Binding to the 4Fe-4S Protein *A. aeolicus* IspH (LytB):

A HYSCORE Investigation

Supporting Information

Weixue Wang, Jikun Li, Ke Wang, Tatyana I. Smirnova, and Eric Oldfield

**Full citation for reference 21:**

M. J. Frisch, G. W. Trucks, H. B. Schlegel, G. E. Scuseria, M. A. Robb, J. R. Cheeseman, G. Scalmani, V. Barone, B. Mennucci, G. A. Petersson, H. Nakatsuji, M. Caricato, X. Li, H. P. Hratchian, A. F. Izmaylov, J. Bloino, G. Zheng, J. L. Sonnenberg, M. Hada, M. Ehara, K. Toyota, R. Fukuda, J. Hasegawa, M. Ishida, T. Nakajima, Y. Honda, O. Kitao, H. Nakai, T. Vreven, J. A. Montgomery, Jr., J. E. Peralta, F. Ogliaro, M. Bearpark, J. J. Heyd, E. Brothers, K. N. Kudin, V. N. Staroverov, R. Kobayashi, J. Normand, K. Raghavachari, A. Rendell, J. C. Burant, S. S. Iyengar, J. Tomasi, M. Cossi, N. Rega, J. M. Millam, M. Klene, J. E. Knox, J. B. Cross, V. Bakken, C. Adamo, J. Jaramillo, R. Gomperts, R. E. Stratmann, O. Yazyev, A. J. Austin, R. Cammi, C. Pomelli, J. W. Ochterski, R. L. Martin, K. Morokuma, V. G. Zakrzewski, G. A. Voth, P. Salvador, J. J. Dannenberg, S. Dapprich, A. D. Daniels, O. Farkas, J. B. Foresman, J. V. Ortiz, J. Cioslowski, and D. J. Fox, Gaussian 09, Revision A.01, Gaussian, Inc., Wallingford CT, 2009.

**Supplementary Methods**

**Materials.** All chemicals were purchased from Sigma-Aldrich (St. Louis, MO) and were used as provided. BL-21(DE3) competent cells were purchased from Stratagene (La Jolla, CA). Syntheses of **7**, **8**, **9**, **10**, **11** were reported previously.<sup>1</sup> The *A. aeolicus* plasmid was provided by Hassan Jomaa and Jochen Wiesner.

**A. aeolicus IspH Protein Production and Purification.** Reconstituted *A. aeolicus* IspH was prepared as reported previously.<sup>2</sup> Anaerobically purified *A. aeolicus* IspH was prepared using a Coy Vinyl Anaerobic Chamber (Coy Laboratories, Grass Lake, MI) with an oxygen level < 2 ppm, and all buffers were degassed on a Schlenk line. Cell pellets were re-suspended in 100 mM Tris-HCl, 150 mM NaCl buffer (pH 8.0). Lysozyme, Benzonase nuclease (EMD Chemicals, San Diego, CA) and phenylmethanesulfonyl fluoride were added, and stirred for 1.5 hour at 10 °C followed by sonication (Fisher Scientific Sonic Dismembrator, Model 500) with 4 pulses, each 7 sec duration and 35% power. The cell lysate was then centrifuged at 11,000 rpm at 10 °C for 30 min. The supernatant was purified by using His-tag affinity chromatography. Fractions having a brown color were collected and desalted in pH 8.0 buffer containing 100 mM Tris-HCl and 150 mM NaCl. *A. aeolicus* IspH was used as purified without reconstitution.

To prepare [<sup>15</sup>N]-labeled *A. aeolicus* IspH, *E. coli* BL-21 (DE3) cells harboring an *A. aeolicus* IspH plasmid were grown in M9 minimal media (12.8 g Na<sub>2</sub>HPO<sub>4</sub>·7H<sub>2</sub>O, 3 g KH<sub>2</sub>PO<sub>4</sub>, and 0.5 g NaCl in 1000 mL distilled H<sub>2</sub>O, supplemented with 2 mL 1M MgSO<sub>4</sub>, 100 μL 1M CaCl<sub>2</sub>, 4 g glucose, 1 g <sup>15</sup>NH<sub>4</sub>Cl and 5 mL 100X MEM vitamin solution (Sigma, St Louis, MO)). When the OD<sub>600</sub> reached 0.6, 400 μg/L anhydrotetracycline was added to induce the overexpression of *A. aeolicus* IspH. Cells were then allowed to grow at 28 °C for 20 hours, then harvested by centrifugation and stored in -80 °C until purification. The <sup>15</sup>N-labeled *A. aeolicus* IspH protein was purified and reconstituted according to published procedures.<sup>2</sup>

**HYSCORE Sample Preparation.** All samples were prepared inside a Coy Vinyl Anaerobic Chamber with an oxygen level < 2 ppm. IspH was typically 1.0-2.0 mM in pH 8.0 Tris-HCl buffer (50 mM Tris-HCl, 150 mM NaCl), and glycerol was added to 40% (v/v). 20 equivalents of sodium dithionite were added as a reducing agent, and ligands were added as follows: **5**, 50 eq.; **6**, 50 eq.; **7**, 10 eq.; **8**, 50 eq.; **9**, 30 eq.; **10**, 30 eq.; **11**, 10 eq.). A 80 μL samples were then transferred into EPR tubes (706-PQ-9.50, Wilmad Labglass, Vineland, NJ), then frozen in liquid nitrogen after a 5-minute incubation with dithionite and ligands.

**ENDOR/HYSCORE Spectroscopy.** HYSCORE spectra were obtained on a Bruker ElexSys E-580-10 FT-EPR X-band EPR spectrometer using an Oxford Instruments CF935 cryostat. HYSCORE used a four-pulse sequence  $\pi/2_{mw} - \tau - \pi/2_{mw} - t_1 - \pi_{mw} - t_2 - \pi/2_{mw} - \text{echo}$ ;  $\pi/2_{mw} = 16$  ns and  $\pi_{mw} = 32$  ns, 256 points for both  $t_1$  and  $t_2$ , each at 16 ns steps. Time-domain data were baseline corrected using a 3<sup>rd</sup> order polynomial, then Hamming windowed, followed by zero-filling, and 2D-Fourier transformation. HYSCORE spectra were simulated using the EasySpin program package.<sup>3</sup>

**Quantum Mechanical Calculations.** All QM calculations were performed with Gaussian 09 software.<sup>4</sup> For all systems, geometry optimization was carried out using the BPW91 functional, a Wachters+*f*<sup>5</sup>,<sup>6</sup> basis set for first-row transition metals, 6-311+G<sup>7</sup> for other atoms. The optimized structures were then used to calculate the <sup>14</sup>N nuclear quadrupole coupling constants using BPW91<sup>8,9</sup> or B3LYP<sup>10,11</sup> functionals, and the aforementioned Wachters, 6-311+G\* or TZVP<sup>12</sup> basis sets. There was little difference between the different calculational results. The QM calculations give the electric field gradient (*eq*) in atomic units; a conversion factor of  $eQ/h = 4.8027$  MHz/a.u. ( $Q = 0.02044$  barn<sup>13</sup>) for <sup>14</sup>N was used to calculate the  $e^2qQ/h$  value, in MHz. Atomic coordinates after geometric optimization of all model compounds are given in Table S2.

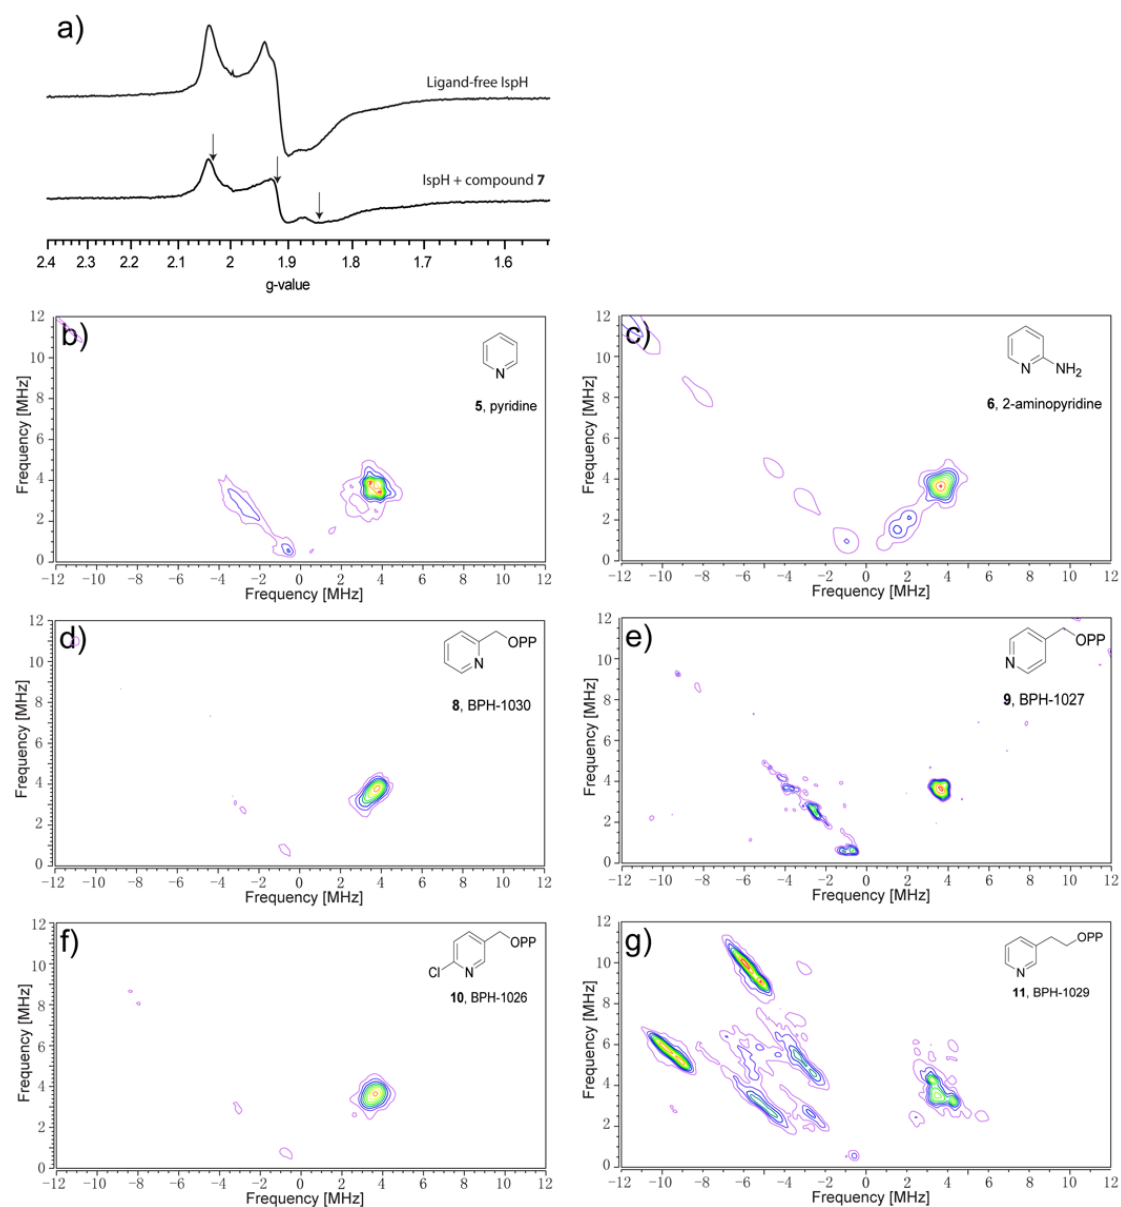

**Figure S1.** Continuous-wave EPR of ligand-free IspH and IspH + **7** (a), and HYSCORE spectra of IspH + pyridine ligands. In (a), arrows indicate the magnetic field positions for collecting field-dependent HYSCORE of IspH + **7**. HYSCORE spectra were taken at  $g_2$ ;  $\tau = 136$  ns.

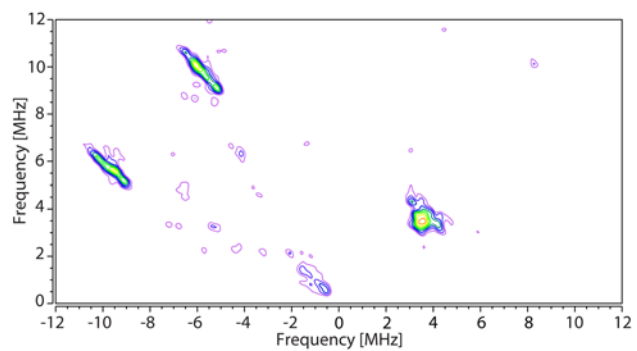

**Figure S2.** HYSCORE spectrum of anaerobically purified *A. aeolicus* IspH + 7. Microwave frequency = 9.68 GHz; magnetic field = 360 mT ( $g_2=1.921$ );  $\tau = 136$ ns.

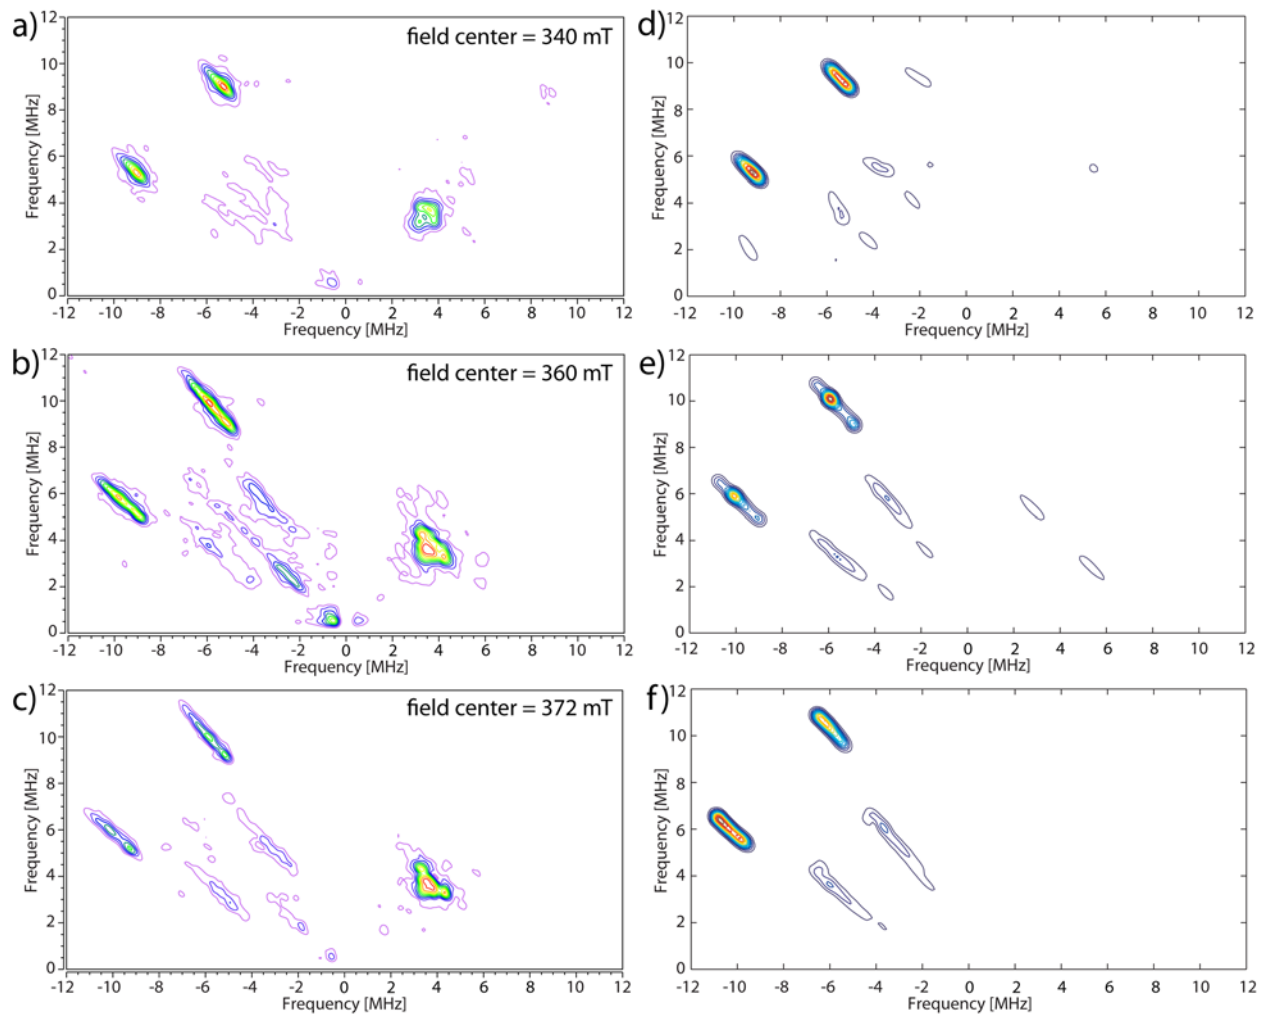

**Figure S3.** HYSORE spectra of *A. aeolicus* IspH + 7 at three different magnetic field strengths and their computer simulations. (a), 340 mT; (b), 360 mT; (c), 372 mT. (d), simulation of (a); (e), simulation of (b); (f), simulation of (c). Microwave frequency = 9.66 GHz;  $\tau = 136$  ns. Simulation parameters are:  $A_{ii}(^{14}\text{N}) = [6.2 \ 7.6 \ 8.4]$  MHz,  $\alpha = 10^\circ$ ,  $\beta = 30^\circ$ ,  $\gamma = 10^\circ$  for the hyperfine interaction and  $e^2qQ/h = 3.0$  MHz,  $\eta = 0.2$ ,  $\alpha = 45^\circ$ ,  $\beta = 60^\circ$ ,  $\gamma = 35^\circ$  for the quadrupole interaction.

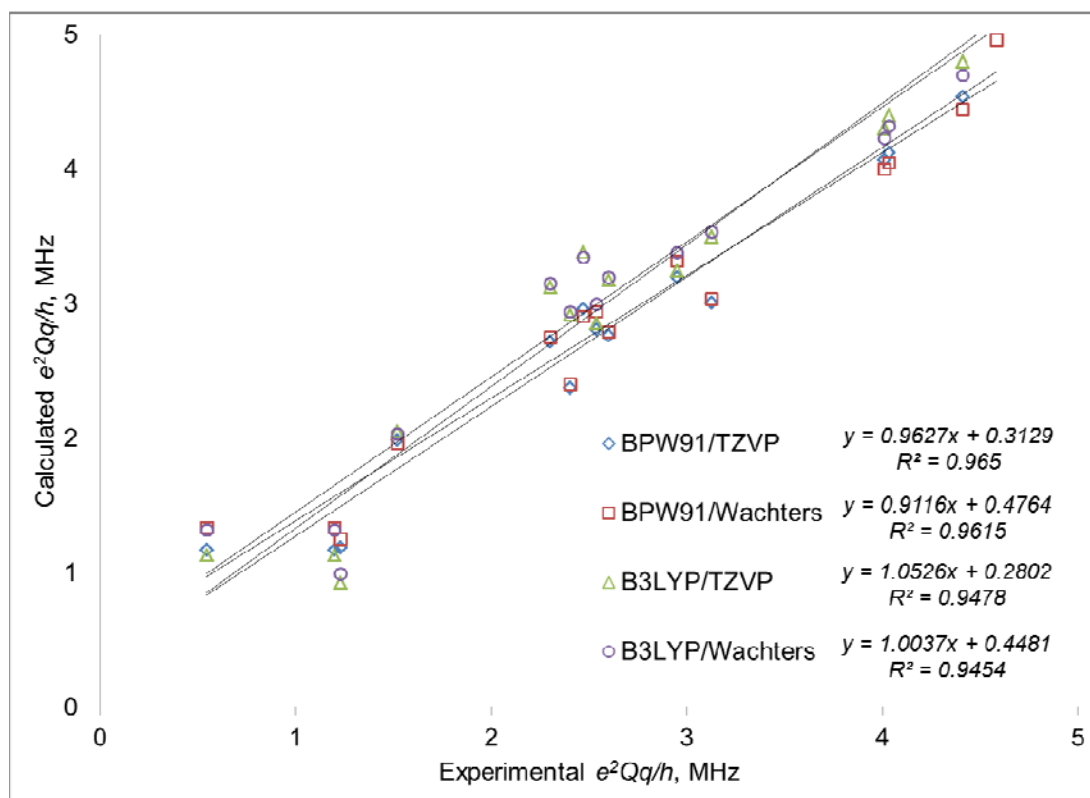

**Figure S4.** Correlation between experimental and computed  $e^2qQ/h$  values for model compounds, using four different basis set/functional combinations.

**Table S1.** Calculated  $^{14}\text{N}$  nuclear quadrupole couplings of 16 nitrogen atoms in 13 model compounds using four different basis set/functional combinations.

| Molecule                                         | Experiment           |                      | BPW91/<br>TZVP |        | BPW91/<br>Wachters |        | B3LYP/<br>TZVP |        | B3LYP/<br>Wachters |        |
|--------------------------------------------------|----------------------|----------------------|----------------|--------|--------------------|--------|----------------|--------|--------------------|--------|
|                                                  | $e^2qQ/h$            | $\eta$               | $e^2qQ/h$      | $\eta$ | $e^2qQ/h$          | $\eta$ | $e^2qQ/h$      | $\eta$ | $e^2qQ/h$          | $\eta$ |
| Pyridine                                         | 4.584 <sup>[a]</sup> | 0.396 <sup>[a]</sup> | 5.006          | 0.369  | 4.963              | 0.326  | 5.236          | 0.364  | 5.285              | 0.410  |
| Pyridinium ( $\text{HSO}_4^-$ )                  | 1.197 <sup>[a]</sup> | 0.426 <sup>[a]</sup> | 1.170          | 0.211  | 1.337              | 0.109  | 1.133          | 0.206  | 1.321              | 0.098  |
| Imidazole(N)                                     | 4.032 <sup>[b]</sup> | 0.120 <sup>[b]</sup> | 4.124          | 0.050  | 4.051              | 0.002  | 4.406          | 0.108  | 4.322              | 0.055  |
| Imidazole(NH)                                    | 2.537 <sup>[b]</sup> | 0.178 <sup>[b]</sup> | 2.812          | 0.177  | 2.942              | 0.218  | 2.855          | 0.165  | 2.998              | 0.209  |
| 1,2,4-Triazole(N1H)                              | 2.95 <sup>[b]</sup>  | 0.553 <sup>[b]</sup> | 3.199          | 0.462  | 3.318              | 0.417  | 3.249          | 0.477  | 3.384              | 0.425  |
| 1,2,4-Triazole(N2)                               | 4.41 <sup>[b]</sup>  | 0.728 <sup>[b]</sup> | 4.541          | 0.74   | 4.449              | 0.794  | 4.803          | 0.683  | 4.700              | 0.739  |
| 1,2,4-Triazole(N4)                               | 4.01 <sup>[b]</sup>  | 0.102 <sup>[b]</sup> | 4.070          | 0.052  | 4.004              | 0.001  | 4.305          | 0.087  | 4.231              | 0.033  |
| Pyridine oxide                                   | 1.227 <sup>[a]</sup> | 0.426 <sup>[a]</sup> | 1.193          | 0.159  | 1.255              | 0.004  | 0.927          | 0.826  | 0.998              | 0.535  |
| Pyridine sulfur trioxide                         | 1.52 <sup>[c]</sup>  | 0.15 <sup>[c]</sup>  | 1.986          | 0.078  | 1.966              | 0.047  | 2.055          | 0.138  | 2.037              | 0.002  |
| N-methylpyridinium                               | 0.545 <sup>[a]</sup> | 0.07 <sup>[a]</sup>  | 1.170          | 0.211  | 1.337              | 0.109  | 1.133          | 0.206  | 1.321              | 0.098  |
| $\text{Fe}(\text{CO})_4\text{Py}$                | 2.402 <sup>[a]</sup> | 0.319 <sup>[a]</sup> | 2.379          | 0.232  | 2.405              | 0.139  | 2.918          | 0.299  | 2.944              | 0.212  |
| $\text{Cr}(\text{CO})_4(2,2'\text{-bipyridine})$ | 3.124 <sup>[a]</sup> | 0.237 <sup>[a]</sup> | 3.011          | 0.094  | 3.041              | 0.026  | 3.502          | 0.203  | 3.538              | 0.137  |
| mitoNEET cluster His                             | 2.47 <sup>[d]</sup>  | 0.38 <sup>[d]</sup>  | 2.965          | 0.223  | 2.908              | 0.299  | 3.385          | 0.104  | 3.347              | 0.188  |
| Rieske cluster His 1                             | 2.6 <sup>[e]</sup>   | 0.346 <sup>[e]</sup> | 2.764          | 0.315  | 2.795              | 0.355  | 3.176          | 0.162  | 3.201              | 0.233  |
| Rieske cluster His 2                             | 2.3 <sup>[e]</sup>   | 0.391 <sup>[e]</sup> | 2.722          | 0.272  | 2.757              | 0.375  | 3.127          | 0.186  | 3.154              | 0.254  |
| IspH + 7                                         | 3.0 <sup>[f]</sup>   | 0.2 <sup>[f]</sup>   | 2.268          | 0.530  | 2.363              | 0.534  | 2.571          | 0.160  | 2.877              | 0.331  |

<sup>[a]</sup>. Reference 14. <sup>[b]</sup>. Reference 15. <sup>[c]</sup>. Reference 16. <sup>[d]</sup>. Reference 17. <sup>[e]</sup>. Reference 18. <sup>[f]</sup>. This work.

**Table S2.** QM geometry optimized coordinates (in Å) of 13 model compounds obtained by using a BPW91 functional and a Wachters basis set for Fe.

| [( $\text{Fe}_4\text{S}_4$ )( $\text{SMe}_4$ ) <sub>3</sub> (pyr)] <sup>2+</sup> , model of IspH + 7 |           |           |           |
|------------------------------------------------------------------------------------------------------|-----------|-----------|-----------|
| Atom                                                                                                 | x         | y         | z         |
| Fe                                                                                                   | 0.697405  | -1.519141 | 1.748632  |
| Fe                                                                                                   | -0.015702 | -0.182461 | 3.959295  |
| Fe                                                                                                   | -1.538219 | -0.202396 | 1.769967  |
| Fe                                                                                                   | 0.774522  | 1.161600  | 1.808083  |
| S                                                                                                    | 1.573820  | -3.459266 | 0.955702  |
| S                                                                                                    | -3.555739 | -0.519003 | 0.888175  |
| S                                                                                                    | 2.082533  | -0.310311 | 3.006850  |
| S                                                                                                    | -1.153356 | 1.593588  | 3.016555  |
| S                                                                                                    | -0.033256 | -0.112543 | 0.112040  |
| S                                                                                                    | -1.079980 | -1.964801 | 3.091548  |
| S                                                                                                    | 1.988536  | 3.051197  | 1.323568  |
| C                                                                                                    | -3.682411 | 0.590582  | -0.587867 |
| H                                                                                                    | -2.918976 | 0.327846  | -1.338466 |
| H                                                                                                    | -4.685797 | 0.473691  | -1.039377 |
| H                                                                                                    | -3.543544 | 1.647250  | -0.304165 |
| C                                                                                                    | 0.762655  | 4.055774  | 0.373424  |
| H                                                                                                    | 1.197245  | 5.050477  | 0.162566  |
| H                                                                                                    | 0.508733  | 3.571951  | -0.584845 |
| H                                                                                                    | -0.166359 | 4.191626  | 0.951340  |

|                                  |           |           |           |
|----------------------------------|-----------|-----------|-----------|
| C                                | 0.118556  | -4.330419 | 0.229090  |
| H                                | -0.661316 | -4.489484 | 0.991553  |
| H                                | -0.319410 | -3.745038 | -0.595898 |
| H                                | 0.445869  | -5.310914 | -0.163435 |
| N                                | 0.087356  | 0.019540  | 5.899781  |
| C                                | 0.589080  | 1.391106  | 7.852330  |
| C                                | 0.489838  | 1.206626  | 6.482796  |
| C                                | -0.221001 | -1.001194 | 6.777851  |
| C                                | -0.142196 | -0.877026 | 8.155797  |
| C                                | 0.272230  | 0.340334  | 8.742391  |
| H                                | 0.917819  | 2.368101  | 8.225830  |
| H                                | 0.729250  | 2.008708  | 5.779484  |
| H                                | -0.540513 | -1.934359 | 6.305643  |
| H                                | -0.407239 | -1.741952 | 8.775495  |
| H                                | 0.345487  | 0.462052  | 9.827606  |
| Fe(CO) <sub>4</sub> (pyr)        |           |           |           |
| Atom                             | x         | y         | z         |
| Fe                               | 0.026096  | 0.001069  | 0.037612  |
| C                                | 1.825469  | -0.041886 | -0.118884 |
| O                                | 2.975319  | -0.069256 | -0.299470 |
| C                                | -0.786788 | 1.619067  | 0.079081  |
| O                                | -1.297389 | 2.663648  | 0.077367  |
| C                                | -0.863250 | -1.576273 | 0.075799  |
| O                                | -1.423232 | -2.595231 | 0.071938  |
| N                                | 0.042289  | -0.001349 | 2.107408  |
| C                                | -0.097096 | 0.005831  | -1.727498 |
| O                                | -0.184312 | 0.009122  | -2.884101 |
| C                                | -1.140918 | 0.025803  | 2.772130  |
| C                                | -1.230625 | 0.026620  | 4.162406  |
| C                                | -0.059558 | -0.001559 | 4.923477  |
| C                                | 1.162097  | -0.029585 | 4.247153  |
| C                                | 1.173315  | -0.028555 | 2.853207  |
| H                                | -2.033646 | 0.047359  | 2.145342  |
| H                                | -2.216875 | 0.049330  | 4.632043  |
| H                                | -0.098032 | -0.001670 | 6.016104  |
| H                                | 2.112489  | -0.052372 | 4.785766  |
| H                                | 2.114649  | -0.050114 | 2.304120  |
| Cr(CO) <sub>4</sub> (2,2'-bipyr) |           |           |           |
| Atom                             | x         | y         | z         |
| Cr                               | 0.453243  | -0.482911 | -0.491684 |
| C                                | 2.281405  | -0.471264 | -0.767528 |
| O                                | 3.438805  | -0.459497 | -0.941460 |
| C                                | 0.367993  | -2.309023 | -0.768075 |
| O                                | 0.310189  | -3.464979 | -0.942441 |



|                                                                                                   |           |           |           |
|---------------------------------------------------------------------------------------------------|-----------|-----------|-----------|
| C                                                                                                 | 0.841016  | -0.887943 | 1.328697  |
| O                                                                                                 | 1.138456  | -1.199442 | 2.408112  |
| C                                                                                                 | 0.277744  | -0.300381 | -2.379564 |
| O                                                                                                 | 0.234931  | -0.256948 | -3.540133 |
| N                                                                                                 | 0.270284  | 1.583175  | -0.136529 |
| N                                                                                                 | -1.603771 | -0.216200 | -0.136971 |
| C                                                                                                 | -2.039285 | 1.054107  | 0.130454  |
| C                                                                                                 | -3.394101 | 1.329179  | 0.379830  |
| C                                                                                                 | -4.327479 | 0.296981  | 0.358065  |
| C                                                                                                 | -3.878866 | -1.001352 | 0.084213  |
| C                                                                                                 | -2.524717 | -1.210378 | -0.154599 |
| C                                                                                                 | 1.301032  | 2.463009  | -0.153685 |
| C                                                                                                 | 1.147123  | 3.824473  | 0.085416  |
| C                                                                                                 | -0.131977 | 4.325397  | 0.359073  |
| C                                                                                                 | -1.201233 | 3.434698  | 0.380354  |
| C                                                                                                 | -0.981348 | 2.069888  | 0.130704  |
| H                                                                                                 | -3.718016 | 2.350211  | 0.590804  |
| H                                                                                                 | -5.384320 | 0.499403  | 0.550670  |
| H                                                                                                 | -4.567425 | -1.849076 | 0.054491  |
| H                                                                                                 | -2.139310 | -2.207931 | -0.371198 |
| H                                                                                                 | 2.282177  | 2.037489  | -0.370141 |
| H                                                                                                 | 2.022135  | 4.478022  | 0.056063  |
| H                                                                                                 | -0.291361 | 5.389540  | 0.551896  |
| H                                                                                                 | -2.208323 | 3.799757  | 0.591164  |
| [(Fe <sub>2</sub> S <sub>2</sub> )(SMe) <sub>3</sub> (Im)] <sup>2+</sup> , mitoNEET cluster model |           |           |           |
| Atom                                                                                              | x         | y         | z         |
| Fe                                                                                                | 15.565009 | -6.863056 | -5.028041 |
| Fe                                                                                                | 13.893362 | -8.003905 | -3.305538 |
| S                                                                                                 | 15.147037 | -9.053765 | -4.809706 |
| S                                                                                                 | 14.092857 | -5.818469 | -3.699522 |
| N                                                                                                 | 14.647719 | -8.261486 | -1.237200 |
| C                                                                                                 | 15.915970 | -8.494740 | -0.713908 |
| C                                                                                                 | 15.905149 | -8.205919 | 0.636709  |
| C                                                                                                 | 13.889179 | -7.843475 | -0.230662 |
| N                                                                                                 | 14.608740 | -7.795571 | 0.933688  |
| C                                                                                                 | 17.054490 | -8.940430 | -1.569158 |
| H                                                                                                 | 16.686014 | -8.240665 | 1.394352  |
| H                                                                                                 | 12.832474 | -7.595106 | -0.325128 |
| H                                                                                                 | 14.279161 | -7.442981 | 1.827121  |
| H                                                                                                 | 16.770848 | -9.820031 | -2.169241 |
| H                                                                                                 | 17.937183 | -9.180776 | -0.950566 |
| H                                                                                                 | 17.325169 | -8.150752 | -2.295152 |
| S                                                                                                 | 15.373509 | -6.058444 | -7.256472 |
| C                                                                                                 | 13.545176 | -6.095344 | -7.522305 |

|                                                                                                |           |           |           |
|------------------------------------------------------------------------------------------------|-----------|-----------|-----------|
| H                                                                                              | 13.305071 | -5.683788 | -8.520243 |
| H                                                                                              | 13.031963 | -5.499622 | -6.750066 |
| H                                                                                              | 13.166201 | -7.128963 | -7.464845 |
| S                                                                                              | 17.822397 | -6.355105 | -4.506396 |
| C                                                                                              | 17.721313 | -4.539352 | -4.171213 |
| H                                                                                              | 18.717621 | -4.151315 | -3.888770 |
| H                                                                                              | 17.008769 | -4.344081 | -3.353879 |
| H                                                                                              | 17.369677 | -4.004593 | -5.068454 |
| S                                                                                              | 11.809433 | -8.837906 | -2.626795 |
| C                                                                                              | 10.628666 | -8.370659 | -3.974043 |
| H                                                                                              | 9.599072  | -8.674263 | -3.704538 |
| H                                                                                              | 10.906121 | -8.868024 | -4.918271 |
| H                                                                                              | 10.646649 | -7.281415 | -4.141760 |
| [(Fe <sub>2</sub> S <sub>2</sub> )(SMe) <sub>2</sub> (Im) <sub>2</sub> ], Rieske cluster model |           |           |           |
| Atom                                                                                           | x         | y         | z         |
| Fe                                                                                             | 67.395051 | 51.076454 | 0.766091  |
| Fe                                                                                             | 69.787283 | 50.246573 | 0.124066  |
| S                                                                                              | 69.318940 | 52.189746 | 1.021368  |
| S                                                                                              | 67.935209 | 49.089138 | -0.111712 |
| N                                                                                              | 70.914613 | 50.270367 | -1.668549 |
| C                                                                                              | 70.709704 | 51.110149 | -2.765000 |
| C                                                                                              | 71.343443 | 50.566905 | -3.862778 |
| C                                                                                              | 71.655179 | 49.252234 | -2.100783 |
| N                                                                                              | 71.937776 | 49.388689 | -3.430149 |
| C                                                                                              | 69.880012 | 52.346354 | -2.673942 |
| H                                                                                              | 71.410014 | 50.898260 | -4.896142 |
| H                                                                                              | 72.442149 | 48.723611 | -4.008577 |
| H                                                                                              | 71.982549 | 48.411709 | -1.494228 |
| H                                                                                              | 69.849796 | 52.865491 | -3.645988 |
| H                                                                                              | 70.273597 | 53.031885 | -1.906149 |
| H                                                                                              | 68.848620 | 52.103133 | -2.361658 |
| N                                                                                              | 71.131010 | 49.059722 | 1.254069  |
| C                                                                                              | 72.329162 | 49.414961 | 1.874325  |
| C                                                                                              | 72.684595 | 48.423898 | 2.765932  |
| C                                                                                              | 70.777990 | 47.877784 | 1.760346  |
| N                                                                                              | 71.698026 | 47.454099 | 2.677303  |
| C                                                                                              | 73.005844 | 50.714840 | 1.584345  |
| H                                                                                              | 73.527435 | 48.328508 | 3.446475  |
| H                                                                                              | 69.849355 | 47.361784 | 1.523958  |
| H                                                                                              | 71.620459 | 46.621228 | 3.253179  |
| H                                                                                              | 72.309278 | 51.549566 | 1.774833  |
| H                                                                                              | 73.305039 | 50.784107 | 0.524441  |
| H                                                                                              | 73.902518 | 50.840564 | 2.212740  |
| S                                                                                              | 66.042618 | 52.357783 | -0.643962 |

|                    |           |           |           |
|--------------------|-----------|-----------|-----------|
| C                  | 64.593703 | 51.237310 | -0.883032 |
| H                  | 63.814715 | 51.763249 | -1.461754 |
| H                  | 64.180040 | 50.937904 | 0.093316  |
| H                  | 64.894064 | 50.328441 | -1.428796 |
| S                  | 66.190799 | 50.731591 | 2.725388  |
| C                  | 65.924853 | 52.466198 | 3.302180  |
| H                  | 65.279528 | 52.458293 | 4.197628  |
| H                  | 65.441237 | 53.061235 | 2.511056  |
| H                  | 66.886284 | 52.939724 | 3.557888  |
| Pyridine           |           |           |           |
| Atom               | x         | y         | z         |
| C                  | 1.145736  | 0.686898  | 0.000000  |
| N                  | 0.000000  | 1.390722  | 0.000000  |
| C                  | -1.145736 | 0.686898  | 0.000000  |
| C                  | -1.201972 | -0.712227 | 0.000000  |
| C                  | 0.000000  | -1.427396 | 0.000000  |
| C                  | 1.201972  | -0.712227 | 0.000000  |
| H                  | 2.066968  | 1.278924  | 0.000000  |
| H                  | -2.066968 | 1.278924  | 0.000000  |
| H                  | -2.166265 | -1.225265 | 0.000000  |
| H                  | 0.000000  | -2.519985 | 0.000000  |
| H                  | 2.166265  | -1.225265 | 0.000000  |
| Pyridinium         |           |           |           |
| Atom               | x         | y         | z         |
| C                  | 1.193979  | 0.686365  | 0.000000  |
| N                  | 0.000000  | 1.332069  | 0.000000  |
| C                  | -1.193979 | 0.686365  | 0.000000  |
| C                  | -1.214138 | -0.701221 | 0.000000  |
| C                  | 0.000000  | -1.402121 | 0.000000  |
| C                  | 1.214138  | -0.701221 | 0.000000  |
| H                  | 0.000000  | 2.353969  | 0.000000  |
| H                  | 2.086612  | 1.310218  | 0.000000  |
| H                  | -2.086612 | 1.310218  | 0.000000  |
| H                  | -2.171722 | -1.221146 | 0.000000  |
| H                  | 0.000000  | -2.493351 | 0.000000  |
| H                  | 2.171722  | -1.221146 | 0.000000  |
| N-methylpyridinium |           |           |           |
| Atom               | x         | y         | z         |
| C                  | 1.189510  | 0.682776  | -0.001677 |
| N                  | 0.011174  | 1.360776  | -0.002018 |
| C                  | -1.174380 | 0.690694  | -0.001594 |
| C                  | -1.205232 | -0.695819 | 0.000277  |
| C                  | -0.000043 | -1.409734 | 0.001243  |
| C                  | 1.208831  | -0.706209 | 0.000459  |

|                          |           |           |           |
|--------------------------|-----------|-----------|-----------|
| H                        | 2.095539  | 1.286441  | -0.002208 |
| H                        | -2.073688 | 1.305630  | -0.002293 |
| H                        | -2.169477 | -1.203728 | 0.001147  |
| H                        | -0.004512 | -2.500673 | 0.002734  |
| H                        | 2.169483  | -1.220838 | 0.001432  |
| C                        | -0.002330 | 2.846232  | -0.004728 |
| H                        | 1.026443  | 3.216264  | 0.006292  |
| H                        | -0.529175 | 3.205461  | 0.886984  |
| H                        | -0.509083 | 3.202248  | -0.909421 |
| Pyridine oxide           |           |           |           |
| Atom                     | x         | y         | z         |
| C                        | 1.186103  | 0.683712  | 0.000000  |
| N                        | 0.000000  | 1.395721  | 0.000000  |
| C                        | -1.186103 | 0.683712  | 0.000000  |
| C                        | -1.198250 | -0.702466 | 0.000000  |
| C                        | 0.000000  | -1.427532 | 0.000000  |
| C                        | 1.198250  | -0.702466 | 0.000000  |
| O                        | 0.000000  | 2.674576  | 0.000000  |
| H                        | 2.071734  | 1.315327  | 0.000000  |
| H                        | -2.071734 | 1.315327  | 0.000000  |
| H                        | -2.164935 | -1.209200 | 0.000000  |
| H                        | 0.000000  | -2.517509 | 0.000000  |
| H                        | 2.164935  | -1.209200 | 0.000000  |
| Pyridine sulfur trioxide |           |           |           |
| Atom                     | x         | y         | z         |
| C                        | 1.156504  | 0.651417  | 0.001795  |
| N                        | -0.019213 | 1.304287  | 0.003756  |
| S                        | -0.017490 | 3.401658  | 0.007699  |
| O                        | -1.480061 | 3.582675  | 0.003299  |
| C                        | -1.185950 | 0.639462  | 0.003952  |
| C                        | -1.214382 | -0.755791 | 0.001871  |
| C                        | -0.003485 | -1.455382 | -0.000204 |
| C                        | 1.200760  | -0.741412 | -0.000357 |
| O                        | 0.708778  | 3.600748  | 1.272240  |
| O                        | 0.717156  | 3.605223  | -1.250968 |
| H                        | 2.051580  | 1.274637  | 0.001697  |
| H                        | -2.080338 | 1.264220  | 0.005446  |
| H                        | -2.172573 | -1.276308 | 0.001819  |
| H                        | 0.003146  | -2.546992 | -0.001905 |
| H                        | 2.164568  | -1.251442 | -0.002140 |
| Imidazole                |           |           |           |
| Atom                     | x         | y         | z         |
| C                        | 0.867718  | 0.889317  | 0.000000  |
| N                        | -0.428931 | 1.365904  | 0.000000  |

|                |           |           |          |
|----------------|-----------|-----------|----------|
| C              | -1.195647 | 0.288639  | 0.000000 |
| N              | -0.448902 | -0.863901 | 0.000000 |
| C              | 0.884036  | -0.489857 | 0.000000 |
| H              | 1.716819  | 1.567928  | 0.000000 |
| H              | -2.282665 | 0.278509  | 0.000000 |
| H              | -0.802594 | -1.814856 | 0.000000 |
| H              | 1.687165  | -1.219683 | 0.000000 |
| 1,2,4-Triazole |           |           |          |
| Atom           | x         | y         | z        |
| C              | 0.947322  | 0.669955  | 0.000000 |
| N              | -0.364993 | 1.060876  | 0.000000 |
| N              | -1.132684 | -0.002851 | 0.000000 |
| N              | -0.305333 | -1.081896 | 0.000000 |
| C              | 1.004069  | -0.711203 | 0.000000 |
| H              | 1.754753  | 1.395123  | 0.000000 |
| H              | -0.706889 | -2.014408 | 0.000000 |
| H              | 1.820755  | -1.424596 | 0.000000 |

#### References

1. Wang, K.; Wang, W.; No, J. H.; Zhang, Y.; Zhang, Y.; Oldfield, E., *J. Am. Chem. Soc.* **2010**, 132, 6719-6727.
2. Wang, W.; Wang, K.; Liu, Y.-L.; No, J. H.; Nilges, M. J.; Oldfield, E., *Proc. Natl. Acad. Sci. U.S.A.* **2010**, 107, 4522-4527.
3. Stoll, S.; Schweiger, A., *J. Magn. Reson.* **2006**, 178, 42-55.
4. Gaussian 09 (Revision A.01): M. J. Frisch et al., see Supporting Information.
5. Wachters, A., *J. Chem. Phys.* **1970**, 52, 1033-1036.
6. Bauschlicher, C. W.; Langhoff, J. S. R.; Barnes, L. A., *J. Chem. Phys.* **1989**, 91, 2399-2411.
7. Raghavachari, K.; Binkley, J. S.; Seeger, R.; Pople, J. A., *J. Chem. Phys.* **1980**, 72, 650-654.
8. Becke, A. D., *Phys. Rev. A* **1988**, 38, 3098-3100.
9. Perdew, J. P.; Wang, Y., *Phys. Rev. B* **1992**, 45, 13244-13249.
10. Becke, A. D., *J. Chem. Phys.* **1993**, 98, 5648-5652.
11. Stephens, P. J.; Devlin, F. J.; Chabalowski, C. F.; Frisch, M. J., *J. Phys. Chem.* **1994**, 98, 11623-11627.
12. Schaefer, A.; Huber, C.; Ahlrichs, R., *J. Chem. Phys.* **1994**, 100, 5829-5835.
13. Tokman, M.; Sundholm, D.; Pyykkö P.; Olsen, J., *Chem. Phys. Lett.* **1997**, 265, 60-64.
14. Rubenacker, G.; Brown, T., *Inorg. Chem.* **1980**, 19, 392-398.
15. Palmer, M. H.; Stephenson, D.; Smith, J. A. S., *Chem. Phys.* **1985**, 97, 103-111.
16. Hunt, S. W.; Leopold, K. R., *J. Phys. Chem. A* **2001**, 105, 5498-5506.
17. Dicus, M. M.; Conlan, A.; Nechushtai, R.; Jennings, P. A.; Paddock, M. L.; Britt, R. D.; Stoll, S., *J. Am. Chem. Soc.* **2010**, 132, 2037-49.
18. Gurbiel, R. J.; Batie, C. J.; Sivaraja, M.; True, A. E.; Fee, J. A.; Hoffman, B. M.; Ballou, D. P., *Biochemistry* **1989**, 28, 4861-71.
